# Supplementary material for: A protective mechanism of probiotic Lactobacillus against hepatic steatosis via reducing host intestinal fatty acid absorption
Source: PubMed Central journal article supplement (PMC6802638; doi:10.1038/s12276-019-0293-4), 2019-08-13

# Supplementary figure 1.

## A

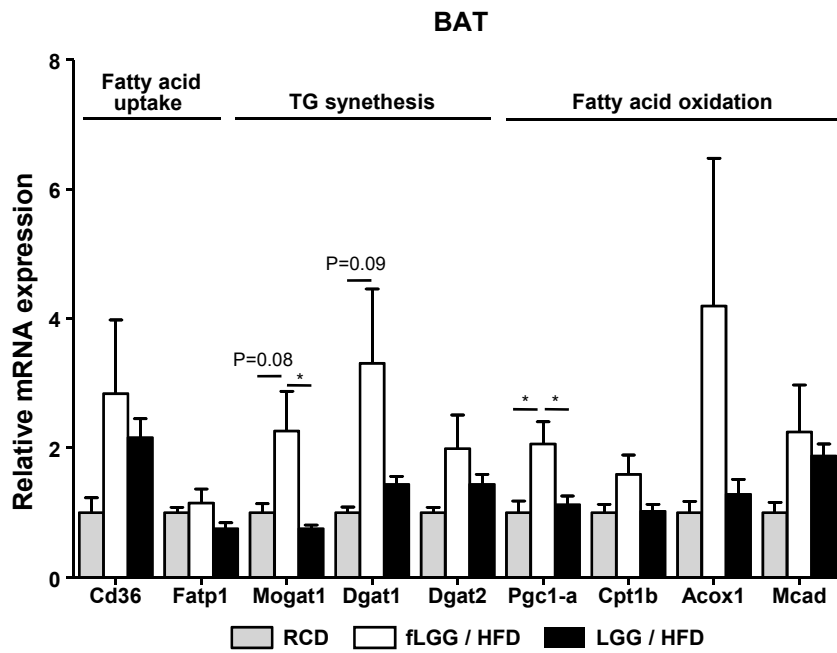

## B

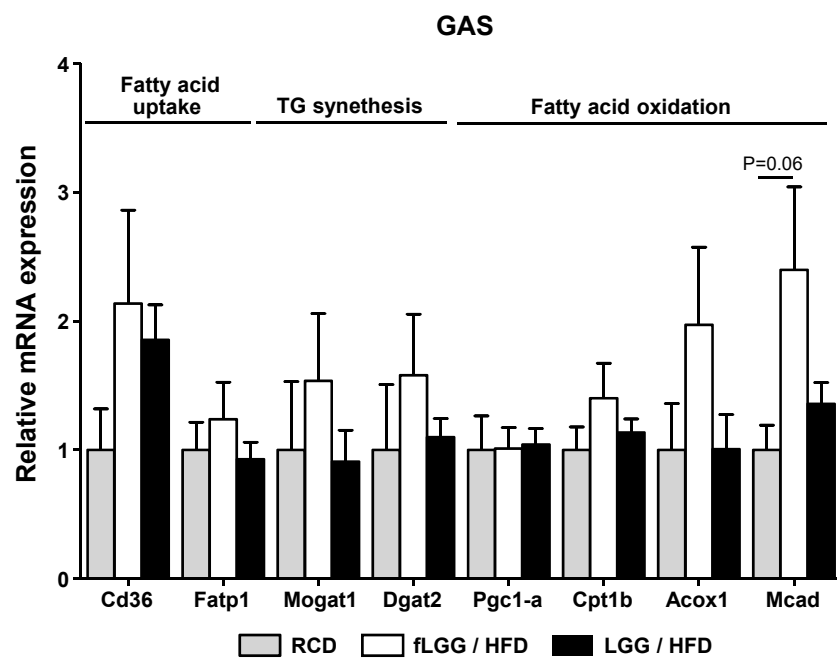

Supplement: 12276_2019_293_MOESM2_ESM.pdf [file 12276_2019_293_MOESM2_ESM.pdf]
